# Supplementary material
Source: HighWire-hosted journal article supplement (https://www.cmaj.ca/highwire/filestream/60024/field_highwire_adjunct_files/0/161379-res-1-at.pdf)
Supplement: 161379-res-1-at.pdf [file 161379-res-1-at.pdf]

## Appendix 1 (as supplied by the authors): Missing data

| Location                         | p16-known        |                  |                       | p16-unknown      |                  |                       | Overall<br>n=3643 |
|----------------------------------|------------------|------------------|-----------------------|------------------|------------------|-----------------------|-------------------|
|                                  | Toronto<br>n=971 | Alberta<br>n=253 | All centres<br>n=1282 | Toronto<br>n=728 | Alberta<br>n=485 | All centres<br>n=2361 |                   |
| Age                              | 0 (0%)           | 0 (0%)           | 0 (0%)                | 0 (0%)           | 0 (0%)           | 0 (0%)                | 0 (0%)            |
| Sex                              | 0 (0%)           | 0 (0%)           | 0 (0%)                | 0 (0%)           | 0 (0%)           | 0 (0%)                | 0 (0%)            |
| Marital status <sup>3</sup>      | 24 (2%)          | 0 (0%)           | 27 (2%)               | 10 (1%)          | 1 (<1%)          | 296 (13%)             | 323 (9%)          |
| Urban/rural                      | 1 (<1%)          | 1 (<1%)          | 3 (<1%)               | 1 (<1%)          | 0 (0%)           | 5 (<1%)               | 8 (<1%)           |
| Body mass index                  | 532 (55%)*       | 4 (2%)           | 542 (42%)             | 486 (67%)*       | 50 (10%)         | 986 (42%)             | 1528 (42%)        |
| Charlson comorbidity index       | 8 (<1%)          | 1 (<1%)          | 22 (2%)               | 16 (2%)          | 1 (<1%)          | 1089 (46%)            | 1111 (30%)        |
| Smoking status <sup>1</sup>      | 1 (<1%)          | 0 (0%)           | 1 (<1%)               | 12 (2%)          | 12 (2%)          | 79 (3%)               | 80 (2%)           |
| Pack-years                       | 81 (8%)          | 5 (2%)           | 93 (7%)               | 21 (3%)          | 34 (7%)          | 554 (23%)             | 647 (18%)         |
| Alcohol consumption <sup>2</sup> | 26 (3%)          | 12 (5%)          | 40 (3%)               | 66 (9%)          | 22 (5%)          | 297 (13%)             | 337 (9%)          |
| Tumor stage                      | 21 (2%)          | 3 (1%)           | 33 (3%)               | 131 (18%)        | 10 (2%)          | 485 (21%)             | 518 (14%)         |
| Nodal stage                      | 21 (2%)          | 2 (1%)           | 30 (2%)               | 128 (18%)        | 9 (2%)           | 464 (20%)             | 494 (14%)         |
| Overall stage                    | 21 (2%)          | 1 (<1%)          | 29 (2%)               | 128 (18%)        | 5 (1%)           | 457 (19%)             | 486 (13%)         |
| Anatomic subsite <sup>4</sup>    | 49 (5%)          | 6 (2%)           | 56 (4%)               | 26 (4%)          | 19 (4%)          | 159 (7%)              | 215 (6%)          |
| Primary treatment                | 3 (<1%)          | 3 (1%)           | 8 (1%)                | 2 (<1%)          | 3 (<1%)          | 7 (<1%)               | 15 (<1%)          |

\*variables that have >50% missing data

<sup>1</sup> current, former, never

<sup>2</sup> none/light, moderate/heavy

<sup>3</sup> married/common-law, never married/separated/divorced/widow

<sup>4</sup> tonsil, base-of-tongue, other
